# Supplementary material for: Using Growth and Transpiration Phenotyping Under Controlled Conditions to Select Water Efficient Banana Genotypes
Source: Front Plant Sci. 2019 Mar 26;10:352. doi: 10.3389/fpls.2019.00352 (PMC6443892; doi:10.3389/fpls.2019.00352)
Supplement: Supplementary file 5 [file Table_1.xlsx]

## Sheet: supplTab1
Supplementary table 1: Morphological variables used in this study with their crop ontology (CO-term), when available
Trait	Description	CO term	CO Variable name	Unit	Class	Method	Formula
leafAreaYoungest	Area of the youngest leaf	CO_325:0000884	singleLeafArea_Meas_cm2	cm²	Area	img
leafAreaCanopy	Area of the whole canopy in topview	CO_325:0000882	topLeafArea_Meas_cm2	cm²	Area	img
leafAreaTot	Total leaf area formed during the experiment	CO_325:0000883	totLeafArea_Meas_cm2	cm²	Area	img
circumferenceCanopy	Circumference of the canopy in topview			cm	Area	img
dAreaRel	Relative area difference between youngest 2 leaves			cm²	Area	img
ddAreaRel	Change of the area difference			cm²	Area	img
dLengthRel	Relative leaf length difference between youngest 2 leaves			cm	Area	img
dWidthRel	Relative leaf width difference between youngest 2 leaves			cm	Area	img
leafLengthYoungest	length of the youngest leaf	CO_325:0000887	singleLeafLength_Meas_cm	cm	Area	img
lengthCanopy	canopy length			cm	Area	img
leafLengthTot	summed leaf length of leaves formed during the experiment	CO_325:0000886	totLeafLength_Meas_cm	cm	Area	img
leafWidthYoungest	width of the youngest leaf	CO_325:0000888	singleLeafWidth_Meas_cm	cm	Area	img
widthCanopy	canopy width			cm	Area	img
leafWidthTot	summed leaf width of leaves formed during the experiment			cm	Area	img
rootGrowthFresh	root growth during the experiment			g	Growth	calc	fresh weight before * (mean relative root weight of control plants per cultivar)
shootGrowthFresh	shoot growth during the experiment			g	Growth	calc	fresh weight before * (mean relative shoot weight of control plants per cultivar)
plantGrowthDry	plant growth during the experiment in dry weight	CO_325:0000914	growthDry_Comp_g	g	Growth	calc	dry weight after - (fresh weight before * (1- average rwc whole plant of control plant of the same cultivar))
plantGrowthFresh	plant growth during the experiment in fresh weight	CO_325:0000915	growthFresh_Comp_g	g	Growth	calc	fresh weight after - fresh weight before
psGrowth_per_leaf	growth of the pseudostem during the experiment per leaf formed	CO_325:0000918	pseudostemHeightIncreasePerFormedLeaf_Comp_cm	cm/#	Growth	calc
psGrowthTot	growth of the pseudostem during the experiment			cm	Growth	calc
leafCount	number of leaves formed during the experiment	CO_325:0000900	numLeaves_Count_unitless	#	Growth	meas
leafCount_per_heightPS	number of leaves formed during the experiment per pseudostem growth	CO_325:0000919	leavesFormedPerPseudostemGrowth_Comp_percm	#/cm	Growth	calc
leafPlantRatioDry	leaf dry weight relative to the whole plant dry weight	CO_325:0000909	leafToPlantMassRatio_Comp_unitless		Mass distribution	calc
leafPlantRatioFresh	leaf fresh weight relative to the whole plant fresh weight				Mass distribution	calc
psPlantRatioDry	pseudostem dry weight relative to the whole plant dry weight	CO_325:0000910	pseudostemToPlantMassRatio_Comp_unitless		Mass distribution	calc
psPlantRatioFresh	pseudostem fresh weight relative to the whole plant fresh weight				Mass distribution	calc
rootPlantRatioDry	root dry weight relative to the whole plant dry weight	CO_325:0000911	rootToPlantMassRatio_Comp_unitless		Mass distribution	calc
rootPlantRatioFresh	root fresh weight relative to the whole plant fresh weight				Mass distribution	calc
rootLeafRatioDry	root dry weight relative to the leaf dry weight				Mass distribution	calc
rootLeafRatioFresh	root fresh weight relative to the leaf fresh weight				Mass distribution	calc
rootShootRatioDry	root dry weight relative to the leaf + pseudostem dry weight	CO_325:0000894	rootShootDry_Comp_unitless		Mass distribution	calc
rootShootRatioFresh	root fresh weight relative to the leaf + pseudostem fresh weight				Mass distribution	calc
TE_dry	transpiration efficiency expressed in dry weight	CO_325:0000904	transpirationEfficiency_Comp_gml	g/mL	Transpiration	calc
TE_fresh	transpiration efficiency expressed in fresh weight			g/mL	Transpiration	calc
plantTranspRate_per_area	transpiration per leaf area	CO_325:0000913	waterLossSystPerLeafArea_Meas_mlcm2	mL/cm²	Transpiration	calc
plantTranspRate_per_day	average daily transpiration (last 7 days)	CO_325:0000912	waterLossDay_Comp_ml	mL	Transpiration	calc
plantTranspTot	total transpiration during the experiment	CO_325:0000903	waterLossPlant_Meas_ml	mL	Transpiration	meas
rwcLeaf	relative water content of the leaves	CO_325:0000895	rwcLeaf_Comp_unitless	%	Water content	calc
rwcPlant	relative water content of the plant	CO_325:0000898	rwcPlant_Comp_unitless	%	Water content	calc
rwcPseudostem	relative water content of the pseudostem	CO_325:0000896	rwcPseudostem_Comp_unitless	%	Water content	calc
rwcRoot	relative water content of the root	CO_325:0000897	rwcRoot_Comp_unitless	%	Water content	calc
