# Supplementary material for: Using Growth and Transpiration Phenotyping Under Controlled Conditions to Select Water Efficient Banana Genotypes
Source: Front Plant Sci. 2019 Mar 26;10:352. doi: 10.3389/fpls.2019.00352 (PMC6443892; doi:10.3389/fpls.2019.00352)
Supplement: Supplementary file 6 [file Table_2.xlsx]

## Sheet: suppTable2
Supplementary table 2: Mean values (± SD) of the 16 morphological traits which change most under mild osmotic stress. Mean (and SD) values for performance group 1 and 2 given separately, together with the impact of mild osmotic stress on that variable. Impact (%) calculated as the difference between mean in 5% PEG and 0% PEG relative to the mean in 0% PEG.
	Performance Group 1			Performance Group 2
Trait	0%PEG	5%PEG	Impact (%)	0%PEG	5%PEG	Impact (%)
rootPlantRatioDry	0.18 ± 0.03	0.26 ± 0.04	44.4	0.18 ± 0.02	0.2 ± 0.06	11.1
rootShootRatioDry	0.23 ± 0.04	0.36 ± 0.07	56.5	0.21 ± 0.03	0.26 ± 0.09	23.8
rootLeafRatioDry	0.38 ± 0.08	0.6 ± 0.11	57.9	0.35 ± 0.06	0.45 ± 0.16	28.6
leafPlantRatioDry	0.5 ± 0.04	0.44 ± 0.04	-12	0.51 ± 0.03	0.48 ± 0.08	-5.9
rwcLeaf	0.92 ± 0.01	0.9 ± 0.02	-2.2	0.92 ± 0.01	0.89 ± 0.03	-3.3
leafLengthYoungest	24.38 ± 2.84	20.35 ± 2.75	-16.5	25.39 ± 3.01	18.69 ± 4.61	-26.4
rwcPlant	0.95 ± 0.01	0.93 ± 0.01	-2.1	0.95 ± 0	0.93 ± 0.02	-2.1
rwcRoot	0.96 ± 0.01	0.94 ± 0.01	-2.1	0.97 ± 0.01	0.94 ± 0.01	-3.1
leafAreaTot	573.76 ± 143.19	399.13 ± 104.54	-30.4	581.78 ± 109.69	303.02 ± 171.3	-47.9
psGrowthTot	10.93 ± 2.39	6.98 ± 2.59	-36.1	9.76 ± 2.36	4.45 ± 2.32	-54.4
leafAreaYoungest	235.6 ± 51.02	169.36 ± 42.62	-28.1	231.61 ± 37.49	126.51 ± 65.56	-45.4
leafWidthTot	31.46 ± 6.52	26.99 ± 5.88	-14.2	33.18 ± 5.54	20.74 ± 9.08	-37.5
leafLengthTot	80.42 ± 14.46	63.64 ± 13.31	-20.9	82.36 ± 11.97	52.66 ± 18.55	-36.1
leafWidthYoungest	12.27 ± 1.58	10.52 ± 1.57	-14.3	11.96 ± 0.98	8.25 ± 2.37	-31
plantTranspRate_per_day	66.95 ± 19.42	51.3 ± 16.67	-23.4	54.32 ± 10.5	28.98 ± 13.8	-46.6
plantTranspTot	962.61 ± 243.4	711.34 ± 178.6	-26.1	850.34 ± 196.94	443.88 ± 219.76	-47.8
